# Supplementary material for: Methyl-CpG-binding domain protein 2 contributes to renal fibrosis through promoting polarized M1 macrophages
Source: PubMed Central journal article supplement (PMC8826408; doi:10.1038/s41419-022-04577-3), 2022-02-08
Supplement: 41419_2022_4577_MOESM1_ESM.pdf [file 41419_2022_4577_MOESM1_ESM.pdf]

**Re: Confirm author changes**  
发件人: aikal2015 <aikal2015@cau.edu.cn>  
时 间: 2022年1月11日 (星期二) 下午11:13  
收件人: 董嵩 <zhidney@qq.com>

Dear Dongshan Zhang  
Yes, I agree with these changes of author list.  
Sincerely  
Kai Ai

发自我的iPhone

----- Original -----  
From: aikal2015 <aikal2015@cau.edu.cn>  
Date: Tue, Jan 11, 2022 3:23 PM  
To: aikal2015 <aikal2015@cau.edu.cn>  
Subject: Re: Confirm author changes

Dear Kai Ai,  
The manuscript titled "Methyl-CpG-binding domain protein 2 contributes to renal fibrosis through promoting polarized M1 macrophages" has been submitted to the journal of Cell Death & Disease. According to their contributions to the revised manuscript, I added the authors Xiaozhou Li and Yijian Li to the author list. Now I'm writing this email to confirm that whether you agree with this change to the author list.  
Hope to hear from you as soon as possible, thank you.  
Best wishes  
Dongshan Zhang

**回复: Confirm author changes**  
发件人: liyijian <liyijian@qq.com>  
时 间: 2022年1月11日 (星期二) 下午4:01  
收件人: 董嵩 <zhidney@qq.com>

Dear Professor Zhang,  
I agree the author change. Thanks for your letter.  
Sincerely,  
Jian Fan

----- 原始邮件 -----  
发件人: 董嵩 <zhidney@qq.com>  
发送时间: 2022年1月11日 (星期二) 下午3:24  
收件人: "liyijian" <liyijian@qq.com>  
主题: Confirm author changes

Dear JianFan,  
The manuscript titled "Methyl-CpG-binding domain protein 2 contributes to renal fibrosis through promoting polarized M1 macrophages" has been submitted to the journal of Cell Death & Disease. According to their contributions to the revised manuscript, I added the authors Xiaozhou Li and Yijian Li to the author list. Now I'm writing this email to confirm that whether you agree with this change to the author list.  
Hope to hear from you as soon as possible, thank you.  
Best wishes  
Dongshan Zhang

**Re:Confirm author changes**  
发件人: cangpaulzhang <cangpaulzhang@163.com>  
时 间: 2022年1月11日 (星期二) 下午3:41  
收件人: 董嵩 <zhidney@qq.com>

Dear prof. Dongshan Zhang,  
I agree with this change to the author list.  
Best wishes  
Pan Zhang

At 2022-01-11 15:30:20, "董嵩" <zhidney@qq.com> wrote:  
Dear Pan Zhang,  
The manuscript titled "Methyl-CpG-binding domain protein 2 contributes to renal fibrosis through promoting polarized M1 macrophages" has been submitted to the journal of Cell Death & Disease. According to their contributions to the revised manuscript, I added the authors Xiaozhou Li and Yijian Li to the author list. Now I'm writing this email to confirm that whether you agree with this change to the author list.  
Hope to hear from you as soon as possible, thank you.  
Best wishes  
Dongshan Zhang

**Re: Confirm author changes**  
发件人: lihulling <lihulling@cau.edu.cn>  
时 间: 2022年1月11日 (星期二) 下午3:32  
收件人: 董嵩 <zhidney@qq.com>

Agree with author changes!  
2022-01-11 15:35:59 "董嵩" <zhidney@qq.com> 写道:  
Dear Hulling Li,  
The manuscript titled "Methyl-CpG-binding domain protein 2 contributes to renal fibrosis through promoting polarized M1 macrophages" has been submitted to the journal of Cell Death & Disease. According to their contributions to the revised manuscript, I added the authors Xiaozhou Li and Yijian Li to the author list. Now I'm writing this email to confirm that whether you agree with this change to the author list.  
Hope to hear from you as soon as possible, thank you.  
Best wishes  
Dongshan Zhang

Re:Confirm author changes

发件人: 董志勇 <zhidney@163.com>
时间: 2022年1月12日 (星期三) 上午11:50
收件人: 曹雷 <zhidney@qq.com>

原文 | 打印 | 删除

邮件可翻译为中文 立即翻译

Dear Dongshan Zhang,
I have received your email and agree with the change to the author list.

Best wishes

Zhibao He

At 2022-01-12 11:38:30, "曹雷" <zhidney@qq.com> wrote:

Dear Zhibao He,

The manuscript titled "Methyl-CpG-binding domain protein 2 contributes to renal fibrosis through promoting polarized M1 macrophages" has been submitted to the journal of Cell Death & Disease. According to their contributions to the revised manuscript, I added the authors Xiaozhou Li and Yijian Li to the author list. Now I'm writing this email to confirm that whether you agree with this change to the author list.

Hope to hear from you as soon as possible, thank you.

Best wishes

Dongshan Zhang

Re: Confirm author changes

发件人: Hongliang Zhang <zhilz@163.com>
时间: 2022年1月11日 (星期二) 下午4:42
收件人: 曹雷 <zhidney@qq.com>

打印 | 删除

请不要回复此邮件以方便邮件追踪。请给发件人、收件人、中间人、发件地址打码并电话。立即删除邮件

邮件可翻译为中文 立即翻译

好的, 谢谢

发件人的Phone:

在 2022年1月11日, 15:34, "曹雷" <zhidney@qq.com> 写道:

Dear Hongliang Zhang,

The manuscript titled "Methyl-CpG-binding domain protein 2 contributes to renal fibrosis through promoting polarized M1 macrophages" has been submitted to the Journal of Cell Death & Disease. According to their contributions to the revised manuscript, I added the authors Xiaozhou Li and Yijian Li to the author list. Now I'm writing this email to confirm that whether you agree with this change to the author list.

Hope to hear from you as soon as possible, thank you.

Best wishes

Dongshan Zhang

回复: Confirm author changes

发件人: 李德刚 <46720869@qq.com>
时间: 2022年1月12日 (星期三) 下午3:37
收件人: 曹雷 <zhidney@qq.com>

原文 | 打印 | 删除

邮件可翻译为中文 立即翻译

I agree with this change to the author list.

发件人:

发件人: 曹雷 <zhidney@qq.com>
发送时间: 2022年1月11日 (星期三) 下午3:35
收件人: 李德刚 <46720869@qq.com>
主题: Confirm author changes

Dear Xiaozhou Li,

The manuscript titled "Methyl-CpG-binding domain protein 2 contributes to renal fibrosis through promoting polarized M1 macrophages" has been submitted to the Journal of Cell Death & Disease. According to their contributions to the revised manuscript, I added the authors Xiaozhou Li and Yijian Li to the author list. Now I'm writing this email to confirm that whether you agree with this change to the author list.

Hope to hear from you as soon as possible, thank you.

Best wishes

Dongshan Zhang

Re:Confirm author changes

发件人: Yijian Li <liyijian163.com>
时间: 2022年1月11日 (星期三) 下午3:53
收件人: 曹雷 <zhidney@qq.com>

原文 | 打印 | 删除

邮件可翻译为中文 立即翻译

Dear Dongshan Zhang:
Yes, I agree with this change to the author list.
Yijian Li

At 2022-01-11 15:35:36, "曹雷" <zhidney@qq.com> wrote:

Dear Yijian Li,

The manuscript titled "Methyl-CpG-binding domain protein 2 contributes to renal fibrosis through promoting polarized M1 macrophages" has been submitted to the Journal of Cell Death & Disease. According to their contributions to the revised manuscript, I added the authors Xiaozhou Li and Yijian Li to the author list. Now I'm writing this email to confirm that whether you agree with this change to the author list.

Hope to hear from you as soon as possible, thank you.

Best wishes

Dongshan Zhang

**Re: Confirm author changes** ☆

发件人: 736596534 <736596534@qq.com>  
时间: 2022年1月12日 (星期三) 上午10:23  
收件人: 警告 <zhkidney@qq.com>

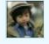

纯文本 | 打印 | 删除

邮件可翻译为中文 立即翻译

Yes, I agree with this change to the author list.

---Original---

**From:** "警告" <zhkidney@qq.com>  
**Date:** Tue, Jan 11, 2022 15:37 PM  
**To:** "736596534" <736596534@qq.com>;  
**Subject:** Confirm author changes

Dear Lei Yi,

The manuscript titled "Methyl-CpG-binding domain protein 2 contributes to renal fibrosis through promoting polarized M1 macrophages" has been submitted to the journal of Cell Death & Disease. According to their contributions to the revised manuscript, I added the authors Xiaozhou Li and Yijian Li to the author list. Now I'm writing this email to confirm that whether you agree with this change to the author list.

Hope to hear from you as soon as possible, thank you.

Best wishes

**回复: Confirm author changes**

发件人: wangyinhual <wangyinhual@163.com>  
时间: 2022年1月12日 (星期三) 下午1:07  
收件人: 警告 <zhkidney@qq.com>

纯文本 | 打印 | 删除

邮件可翻译为中文 立即翻译

I agree with the changes of authors.  
Dr. Yinhual Wang

原邮件转换为手机

原始邮件

发件人: 警告 <zhkidney@qq.com>  
日期: 2022年1月11日 下午3:40  
收件人: wangyinhua <wangyinhual@163.com>  
主题: Confirm author changes

Dear Yinhual Wang,

The manuscript titled "Methyl-CpG-binding domain protein 2 contributes to renal fibrosis through promoting polarized M1 macrophages" has been submitted to the journal of Cell Death & Disease. According to their contributions to the revised manuscript, I added the authors Xiaozhou Li and Yijian Li to the author list. Now I'm writing this email to confirm that whether you agree with this change to the author list.

Hope to hear from you as soon as possible, thank you.

Best wishes

Dongshan Zhang

**Re: Confirm author changes**

发件人: ky178211080 <ky178211080@csu.edu.cn>  
时间: 2022年1月11日 (星期二) 下午3:55  
收件人: 警告 <zhkidney@qq.com>

打印 | 删除

这不是腾讯公司的官方邮箱, 请谨慎操作, 谨防诈骗, 你提供的号码已过期, 请原址注册

邮件可翻译为中文 立即翻译

Dear Dongshan Zhang:  
Yes, I agree with this change to the author list.  
Sincerely  
Ye Kang

2022-01-11 15:39:10 "警告" <zhkidney@qq.com> 回复:

Dear Ye Kang,

The manuscript titled "Methyl-CpG-binding domain protein 2 contributes to renal fibrosis through promoting polarized M1 macrophages" has been submitted to the journal of Cell Death & Disease. According to their contributions to the revised manuscript, I added the authors Xiaozhou Li and Yijian Li to the author list. Now I'm writing this email to confirm that whether you agree with this change to the author list.

Hope to hear from you as soon as possible, thank you.

Best wishes

Dongshan Zhang

**回复: Confirm author changes**

发件人: xudongx\_99 <xudongx\_99@hotmail.com>  
时间: 2022年1月11日 (星期二) 下午9:16  
收件人: 曹雷 <zhaidney@qq.com>

博文

邮件可能转为中文 立即翻译

I agree with this change to the author list.

发件人的作为手机

----- 原始邮件 -----  
发件人: 曹雷 <zhaidney@qq.com>  
日期: 2022年1月11日 (星期二) 下午9:40  
收件人: xudongx\_99 <xudongx\_99@hotmail.com>  
主题: Confirm author changes

Dear Xudong Xiang,

The manuscript titled "Methyl-CpG-binding domain protein 2 contributes to renal fibrosis through promoting polarized M1 macrophages" has been submitted to the journal of Cell Death & Disease. According to their contributions to the revised manuscript, I added the authors Xiaozhou Li and Yijian Li to the author list. Now I'm writing this email to confirm that whether you agree with this change to the author list.

Hope to hear from you as soon as possible, thank you.

Best wishes

Dongshen Zhang

**Re: Confirm author changes**

发件人: chaixiangping <chaixiangping@ccu.edu.cn>  
时间: 2022年1月11日 (星期二) 上午9:58  
收件人: 曹雷 <zhaidney@qq.com>

博文 | 个人中心

邮件可能转为中文 立即翻译

Dear Dongshen,

I agree with this change to the author list.

Best,

Xiangping Chai

----- 原始邮件 -----  
发件人: 曹雷 <zhaidney@qq.com>  
发送时间: 2022年1月11日 (星期二) 下午9:41:00  
收件人: chaixiangping <chaixiangping@ccu.edu.cn>  
抄送:  
主题: Confirm author changes

Dear Xiangping Chai,

The manuscript titled "Methyl-CpG-binding domain protein 2 contributes to renal fibrosis through promoting polarized M1 macrophages" has been submitted to the journal of Cell Death & Disease. According to their contributions to the revised manuscript, I added the authors Xiaozhou Li and Yijian Li to the author list. Now I'm writing this email to confirm that whether you agree with this change to the author list.

Hope to hear from you as soon as possible, thank you.

Best wishes

Dongshen Zhang
